# Supplementary material for: Cannabinoids affect the mouse visual acuity via the cannabinoid receptor type 2
Source: Springer Nature journal article supplement (doi:10.1038/s41598-020-72553-y), 2020-09-25

## **Supplementary Information**

Cannabinoids Affect the Mouse Visual Acuity via the Cannabinoid Receptor Type 2

Bruno Cécycy, Ismaël Bachand, François Papineau, Chloé Brochu, Christian Casanova,  
Jean-François Bouchard

Supplementary Figure 1

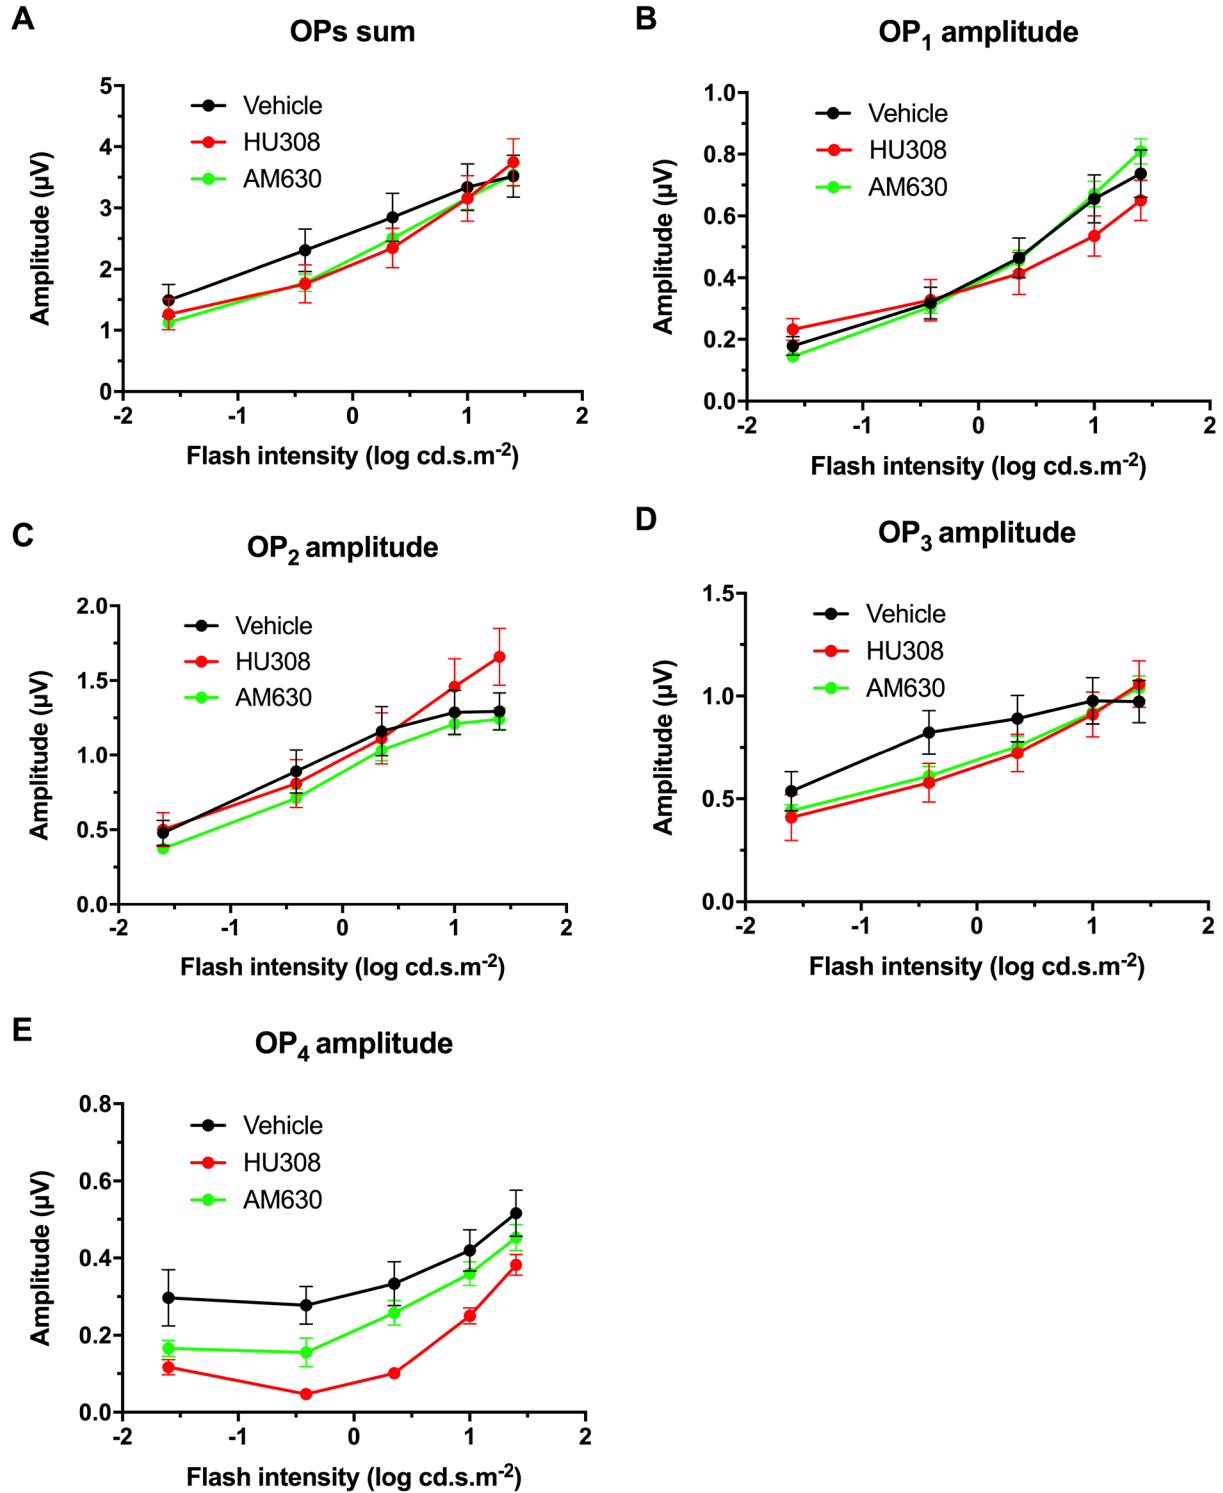

Supplementary Figure 2

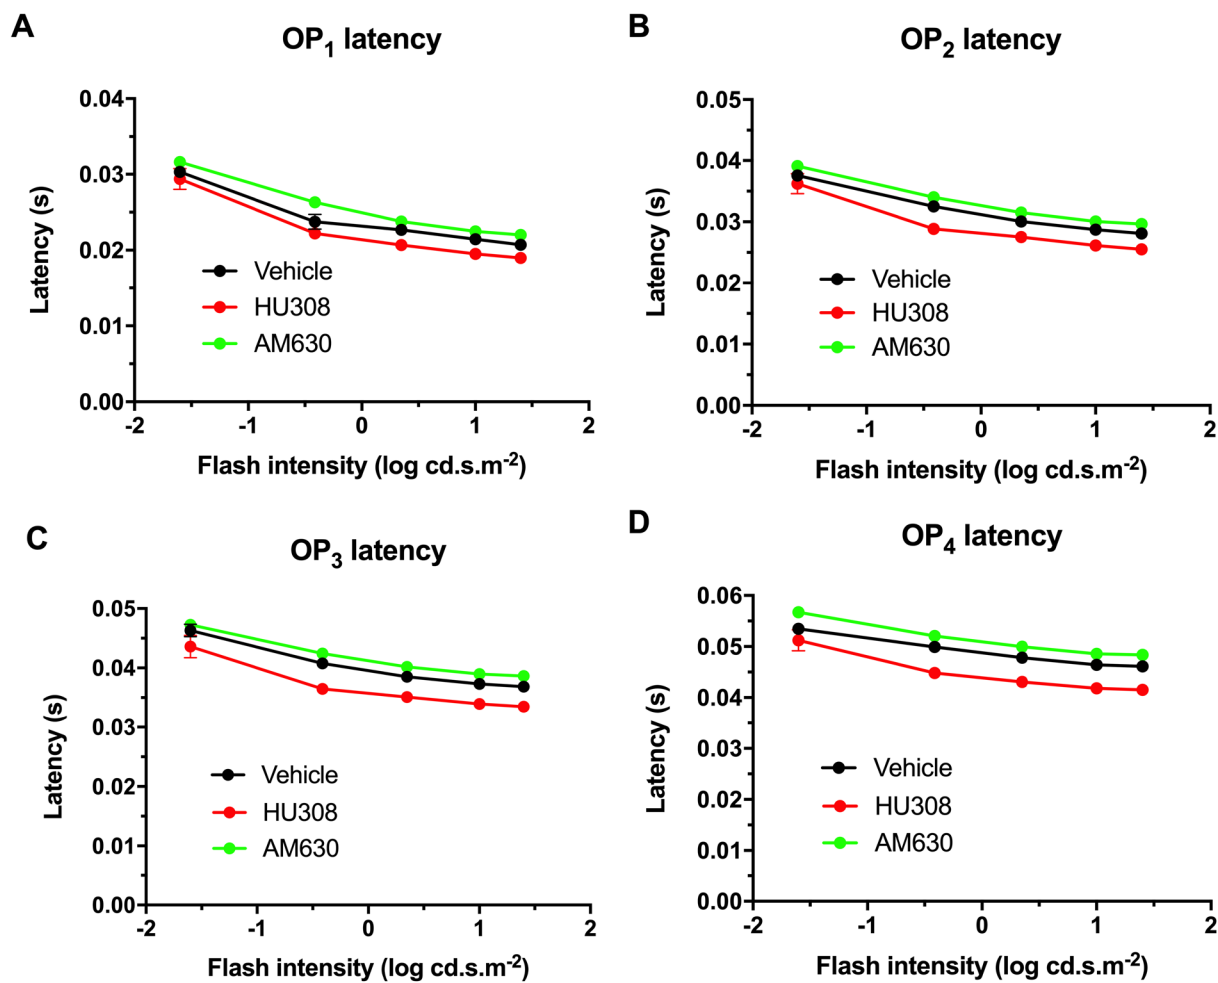

Supplementary Figure 3

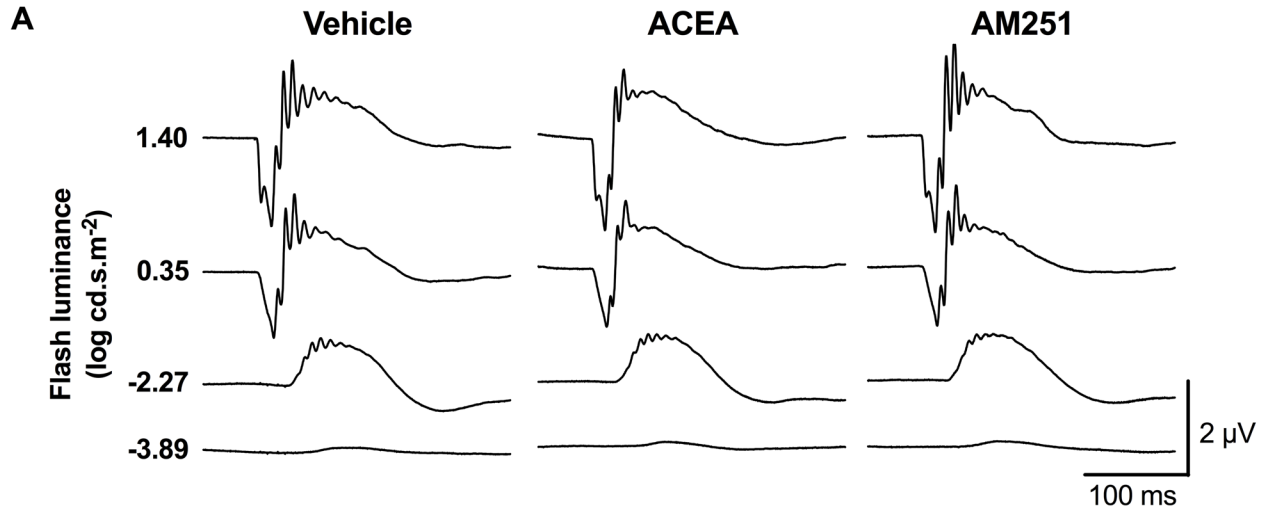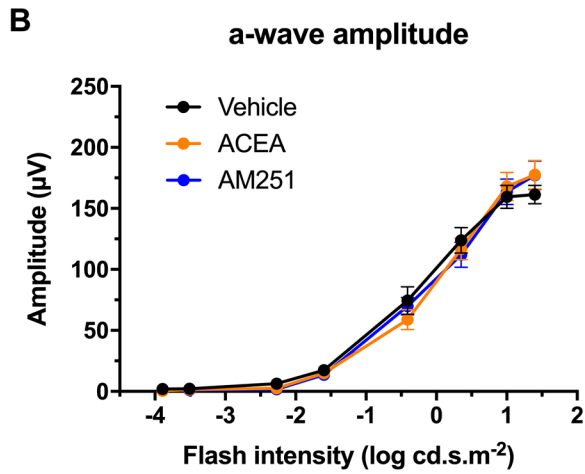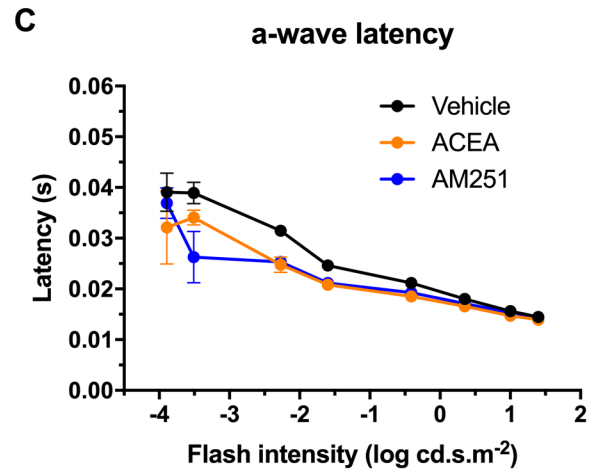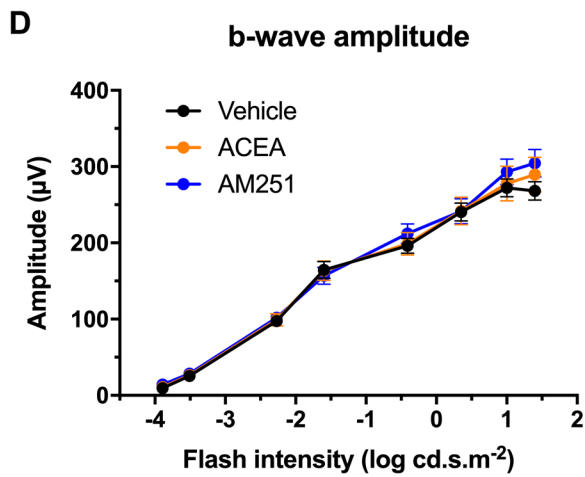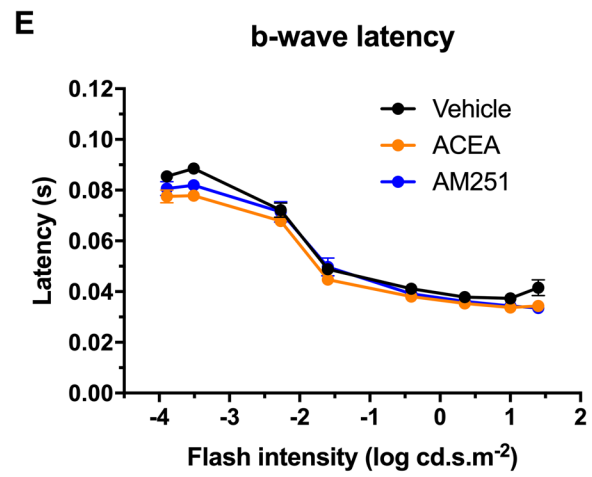

Supplementary Figure 4

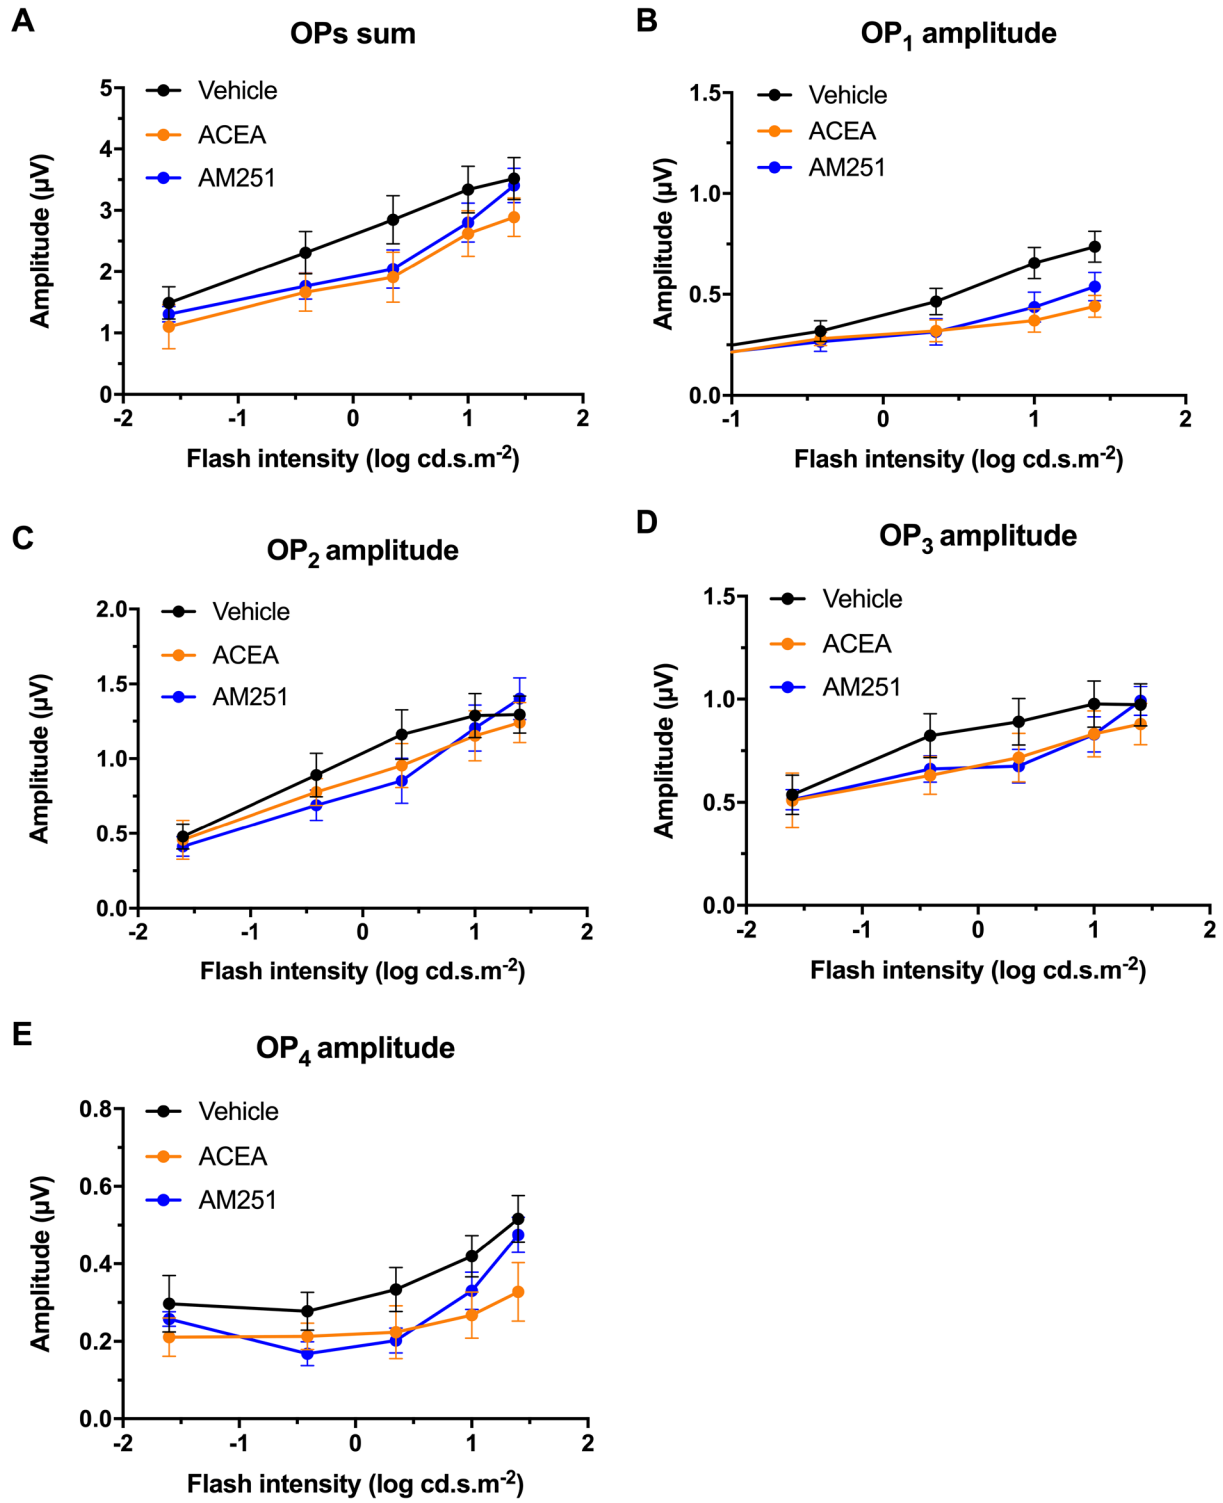

Supplementary Figure 5

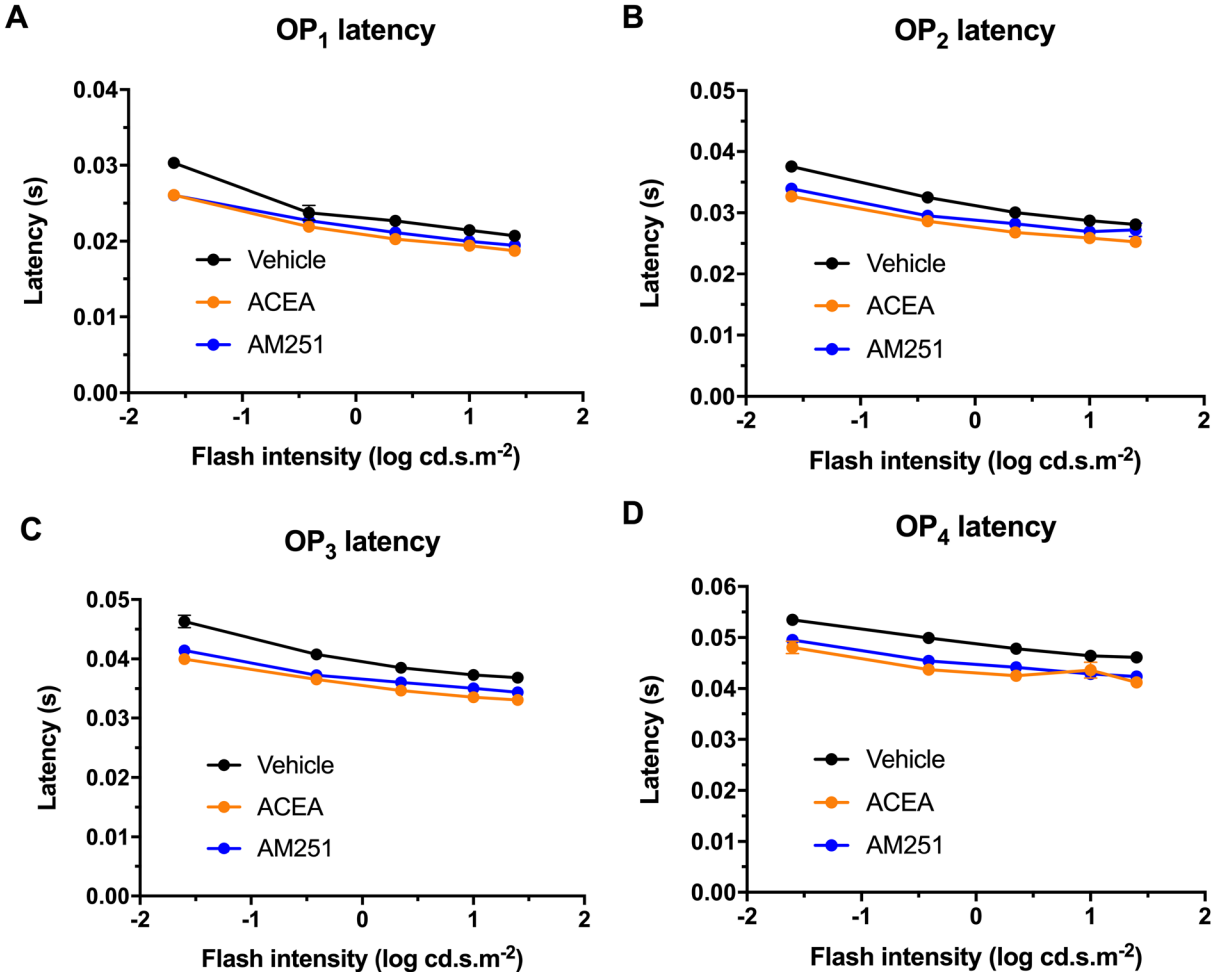

Supplementary Figure 6

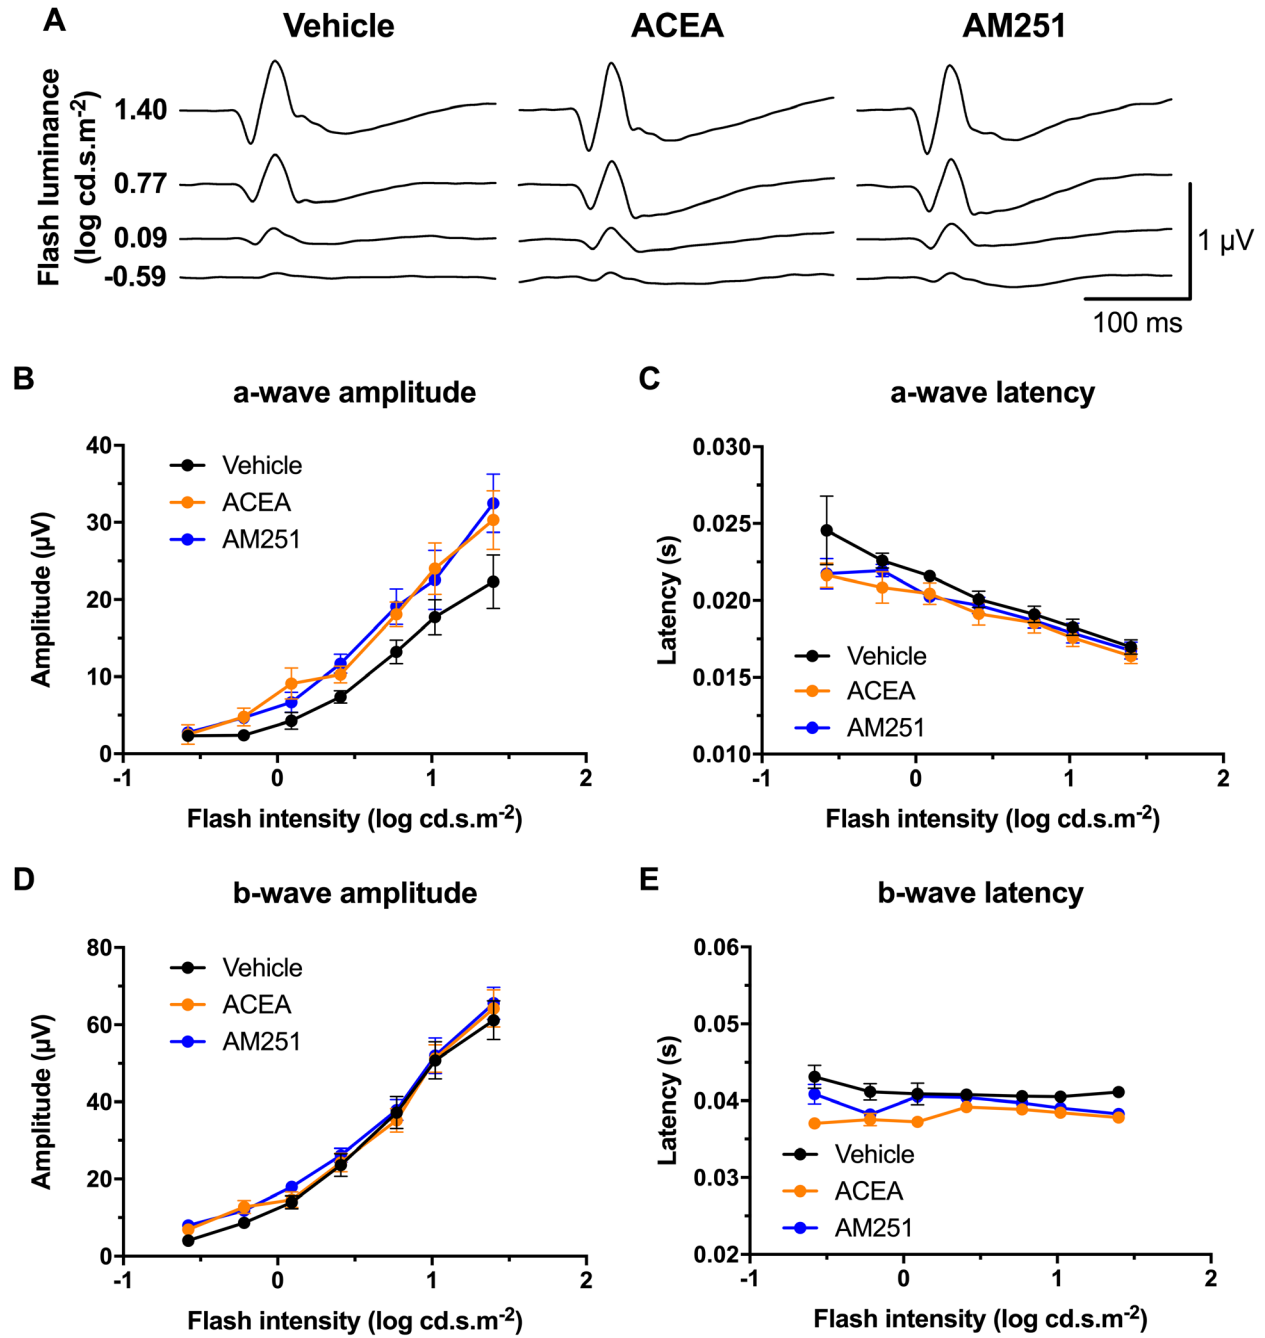

Supplementary Figure 7

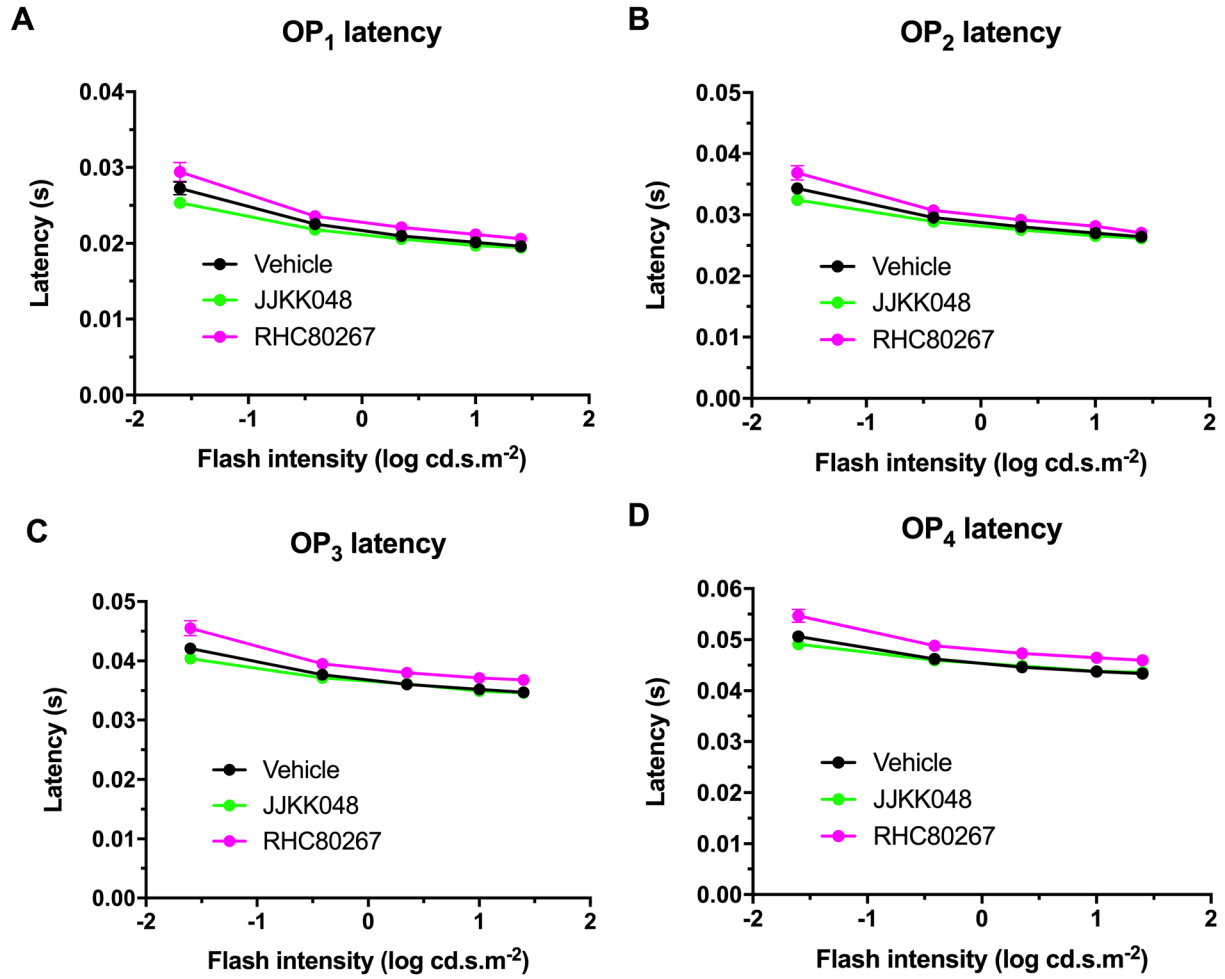

Supplement: MOESM1 [file 41598_2020_72553_MOESM1_ESM.pdf]
